# Supplementary material for: Three-Dimensional Lower Limb Kinematics from Accelerometers and Gyroscopes with Simple and Minimal Functional Calibration Tasks: Validation on Asymptomatic Participants
Source: Preprints.org preprint supplement (doi:10.20944/preprints202206.0388.v1), 2022-06-28
Supplement: Supplementary file 1 [file SuppMaterial_V2.xlsx]

## Sheet: Feuil1
		Pelvis		Pelvis		Pelvis		Hip		Hip		Hip		Knee		Knee		Knee		Ankle		Foot
		Flexion/Extension		Obliquity		Internal/External rotation		Flexion/Extension		Abduction/adduction		Internal/External rotation		Flexion/Extension		Abduction/adduction		Internal/External rotation		Flexion/Extension		Internal/External rotation
		mean	sd	mean	sd	mean	sd	mean	sd	mean	sd	mean	sd	mean	sd	mean	sd	mean	sd	mean	sd	mean	sd	MEAN	MEDIAN	MAX	MIN
IMU	RMSE	14.1032	2.78931	2.20641	0.753371	2.19013	1.06699	7.84337	2.26408	5.13167	3.83575	9.57757	2.48768	7.32308	3.11054	7.23492	3.50708	7.49795	3.01988	7.2082	2.12986	12.2232	3.53339	7.50361	7.32308	14.1032	2.19013
	RMSE centered	1.19174	0.253554	1.55698	0.444991	1.05871	0.406552	4.56639	1.11174	2.93753	1.42022	7.7218	1.30014	5.19431	2.84442	3.7871	1.91364	5.42574	1.29296	5.52125	2.35204	5.52918	0.902948	4.04461	4.56639	7.7218	1.05871
	Correlation coefficient	0.253353	0.345914	0.903638	0.0530728	0.907104	0.145409	0.978201	0.01662	0.978201	0.01662	0.361406	0.262802	0.968753	0.0503471	0.377006	0.294835	0.194894	0.259728	0.84522	0.0995935	0.133282	0.342341	0.627369	0.84522	0.978201	0.133282
	associated p value	0.0434019	0.155935	5.2646e-85	5.62105e-84	4.11946e-09	4.39838e-08	6.00282e-168	0	6.00282e-168	0	0.0176727	0.116627	2.94532e-73	4.2478e-72	0.0181085	0.0906839	0.109827	0.233244	2.6701e-55	3.85087e-54	0.0369077	0.144413
	ROM difference	0.848503	0.65064	1.54897	0.974732	1.51237	1.05705	6.47545	3.60336	6.47545	3.60336	27.2189	7.4197	5.16288	3.86785	6.55861	4.53006	7.39877	3.67833	7.13226	5.71665	4.84732	3.32497	6.8345	6.47545	27.2189	0.848503
CLUSTER	RMSE	12.0774	2.71319	2.85825	0.75738	3.0469	1.63158	6.91778	2.21951	6.43493	4.05082	11.8279	5.1473	6.56383	1.88675	11.8079	5.48817	9.8898	5.10022	8.25041	3.6261	7.62666	2.74124	7.93652	7.62666	12.0774	2.85825
	RMSE centered	0.880402	0.305667	2.36164	0.450875	1.22844	0.64345	3.74986	0.79428	3.02889	1.42115	7.84076	1.3552	4.2322	0.648512	4.38392	2.50662	6.38565	2.11602	2.07509	0.645839	5.52972	1.06376	3.7906	3.74986	7.84076	0.880402
	Correlation coefficient	0.481628	0.422307	0.760531	0.0809621	0.90563	0.149598	0.988563	0.00538789	0.854096	0.125101	0.340252	0.25515	0.984906	0.00447399	0.264229	0.400737	0.130798	0.289139	0.973731	0.020746	0.202501	0.330699	0.626079	0.760531	0.988563	0.130798
	associated p value	0.00793316	0.0463415	5.76013e-47	5.10287e-46	0.00696105	0.0743236	0	0	2.0989e-24	3.08466e-23	0.0264505	0.117343	0	0	0.0822172	0.218062	0.0930602	0.220235	5.73028e-158	8.42176e-157	0.0348117	0.129376
	ROM difference	0.878303	0.901166	1.87842	1.1609	2.16653	1.71716	5.67696	3.04477	2.96918	3.63099	25.8634	7.38971	5.95062	3.71842	6.67528	5.22551	7.39088	4.481	2.86172	1.85788	4.51413	3.39806	6.07504	4.51413	25.8634	0.878303
