# Supplementary material for: Three-Dimensional Lower Limb Kinematics from Accelerometers and Gyroscopes with Simple and Minimal Functional Calibration Tasks: Validation on Asymptomatic Participants
Source: Preprints.org preprint supplement (doi:10.20944/preprints202206.0388.v1), 2022-06-28
Supplement: Supplementary file 2 [file Supplementary material caption.docx]

**Supplementary material caption**

Table S1 - Validity metrics (root mean square error (RMSE), centered RMSE, correlation coefficient and difference in range of motion (ROM)) regarding the IMU- and cluster-based kinematics against the reference (anatomical markers-based kinematics)
